# Supplementary material
Source: PubMed Central journal article supplement (PMC9272826)
Supplement: NIHMS1819346-supplement-Supplementary_data.pdf [file NIHMS1819346-supplement-Supplementary_data.pdf]

Supplement 1. Survey Questions

**Genetic Testing in the NICU**

**Although many of us work at multiple institutions, please answer the following questions related to the NICU in which you primarily practice.**

**When caring for your patients, how important is it to know whether or not they have an underlying genetic diagnosis as the explanation of their medical problems?**

- Not at all important
- Slightly important
- Very important
- Extremely important

**Are there clinical geneticists available for consults in your NICU?**

- Yes
- No

**Does your NICU send exome sequencing as a clinical test (i.e. not through a research study)?**

- Yes
- No
- I don't know

**If NO: Is exome sequencing performed as a research test (i.e. by enrolling in a research study)?**

- Yes
- No
- I don't know

**If YES: Who is typically responsible for ordering the exome sequencing test? (check all that apply)**

- NICU team
- Genetics team
- Other service [free text]

**IF YES: Who is responsible for obtaining consent for exome sequencing? (check all that apply)**

- NICU team
- Genetics team

- Other service [free text]

**IF YES: How long does it usually take for exome sequencing results to come back?**

- Less than two weeks
- Two weeks to one month
- One to three months
- More than three months

**Does your NICU send genome sequencing as a clinical test?**

- Yes
- No
- I don't know

**If NO: Is genome sequencing performed as a research test?**

- Yes
- No
- I don't know

**If YES: Who is typically responsible for ordering the genome sequencing test? (check all that apply)**

- NICU team
- Genetics team
- Other subspecialty team
- Other service [free text]

**IF YES: Who is responsible for obtaining consent for genome sequencing? (check all that apply)**

- NICU team
- Genetics team
- Other subspecialty team
- Other service [free text]

**IF YES: How long does it usually take for genome sequencing results to come back?**

- Less than two weeks
- Two weeks to one month
- One to three months
- More than three months

**What is your comfort level with selecting the appropriate genetic test for babies in your NICU?**

- Very uncomfortable
- Somewhat uncomfortable
- Neither comfortable nor uncomfortable
- Somewhat comfortable
- Very comfortable

**For each of the following tests, please choose the response that best reflects how the test is ordered in your NICU:**

|                                                                                                                                                         | Karyotype | Chromosomal microarray | Single gene sequencing test | Gene panel | Exome sequencing | Genome Sequencing |
|---------------------------------------------------------------------------------------------------------------------------------------------------------|-----------|------------------------|-----------------------------|------------|------------------|-------------------|
| The NICU team can order this test independently (e.g. without obtaining permission from an oversight committee or involving the clinical genetics team) |           |                        |                             |            |                  |                   |
| The NICU team can order this test independently after getting permission from an oversight committee                                                    |           |                        |                             |            |                  |                   |
| The NICU team can order this test under the guidance of a clinical geneticist or genetics team but without permission from an oversight committee       |           |                        |                             |            |                  |                   |
| The NICU team can order this test under the guidance of a clinical geneticist or genetics team and with permission from an oversight committee          |           |                        |                             |            |                  |                   |
| We cannot send this test in my NICU                                                                                                                     |           |                        |                             |            |                  |                   |
| We cannot send this test in my NICU now but are planning to do so in the future                                                                         |           |                        |                             |            |                  |                   |

**In your opinion, are there babies in your NICU who need the following tests but you are unable to send them?**

|                               | Yes | No |
|-------------------------------|-----|----|
| <b>Karyotype</b>              |     |    |
| <b>Chromosomal microarray</b> |     |    |

|                                    |  |  |
|------------------------------------|--|--|
| <b>Single gene sequencing test</b> |  |  |
| <b>Gene panel</b>                  |  |  |
| <b>Exome sequencing</b>            |  |  |
| <b>Genome sequencing</b>           |  |  |

### **Demographics**

What is your age?

- Under 30
- 31-40
- 41-50
- 51-60
- 61-70
- Over 70

How many years have you been in practice as a neonatologist?

- Less than five years
- 5-10 years
- 11-20 years
- More than 20 years

The NICU where you primarily work is:

- Level one
- Level two
- Level three
- Level four

In which region of the country do you practice? [drop down menu with state selection]

What is the name of hospital in which your NICU is located? (This will allow us to consider group responses from the same NICU). [free text]

## Supplement 2

Overall, 21 NICUs had more than one respondent. The data below present the number of times that individual respondents from the same NICU had differing responses.

**1. Are there clinical geneticists available for consults in your NICU?:**

1/21 with differing responses

**2. Does your NICU send exome sequencing as a clinical test (i.e. not through a research study)?**

2/21 with differing responses

**3. Who is typically responsible for ordering the exome sequencing test? (check all that apply)**

10/21 with differing responses

**4. Who is responsible for obtaining consent for exome sequencing? (check all that apply)**

8/21 with differing responses

**5. How long does it usually take for exome sequencing results to come back?**

8/21 with differing responses

**6. Is exome sequencing performed as a research test (i.e. by enrolling in a research study)?**

1/21 with differing responses

**7. Does your NICU send genome sequencing as a clinical test?**

5/21 with differing responses

**8. Who is typically responsible for ordering the genome sequencing test? (check all that apply)**

3/21 with differing responses

**9. How long does it usually take for genome sequencing results to come back?**

2/21 with differing responses

**10. Is genome sequencing performed as a research test?**

3/21 with differing responses

**11. For each of the following tests, please choose the response that best reflects how the test is ordered in your NICU:**

**Karyotype:** 6/21 differing responses

**Chromosomal microarray:** 10/21 differing responses

**Single gene:** 14/21 differing responses

**Gene panel:** 16/21 differing responses

**Exome sequencing:** 11/21 differing responses

**Genome sequencing:** 14/21 differing responses
